# Supplementary material
Source: publisher site journal article supplement (https://en-cdn.bio-protocol.org/attached/file/20190716/3319%20Bio%20protocol%20Appendix.docx)
Supplement: Supplementary file 1 [file 3319%20Bio%20protocol%20Appendix.docx]

**Appendix**Results for the analysis of a representative experiment (Tables S1-S3).

**Table S1. Spread in the absence of neutralizing antibodies**

| Field of View | mCherry positive | GFP positive | mCherry AND GFP positive |
| --- | --- | --- | --- |
| 1 | 65 | 70 | 26 |
| 2 | 77 | 63 | 27 |
| 3 | 64 | 104 | 35 |
| 4 | 51 | 103 | 31 |
| 5 | 7 | 100 | 9 |
| 6 | 63 | 128 | 41 |
| 7 | 88 | 107 | 60 |
| SUM | 415 | 675 | 229 |

**Table S2. Spread in the presence of neutralizing antibodies**

| Field of View | mCherry positive | GFP positive | mCherry AND GFP positive |
| --- | --- | --- | --- |
| 1 | 29 | 126 | 21 |
| 2 | 17 | 68 | 12 |
| 3 | 58 | 163 | 41 |
| 4 | 67 | 128 | 35 |
| 5 | 28 | 82 | 18 |
| 6 | 34 | 78 | 10 |
| 7 | 95 | 89 | 17 |
| SUM | 328 | 734 | 154 |

**Table S3. Spread to non-susceptible cells**

| Field of View | mCherry positive | GFP positive | mCherry AND GFP positive |
| --- | --- | --- | --- |
| 1 | 30 | 70 | 3 |
| 2 | 30 | 97 | 3 |
| 3 | 23 | 104 | 4 |
| 4 | 13 | 128 | 4 |
| 5 | 15 | 136 | 9 |
| 6 | 21 | 126 | 7 |
| 7 | 26 | 144 | 10 |
| SUM | 158 | 805 | 40 |
